# Supplementary material for: Natural Variation for Lifespan and Stress Response in the Nematode Caenorhabditis remanei
Source: PLOS journal article supplement (doi:10.1371/journal.pone.0058212), 2013-04-26

Figure S1. Mean survival time (in days) of *C. remanei* daughters regressed upon lifespan of mothers. All worms were mated to three male *C. remanei* for 24 hours, and kept under typical laboratory conditions (20C, nematode growth media, lawn of *E. coli*). Slope = 0.03.

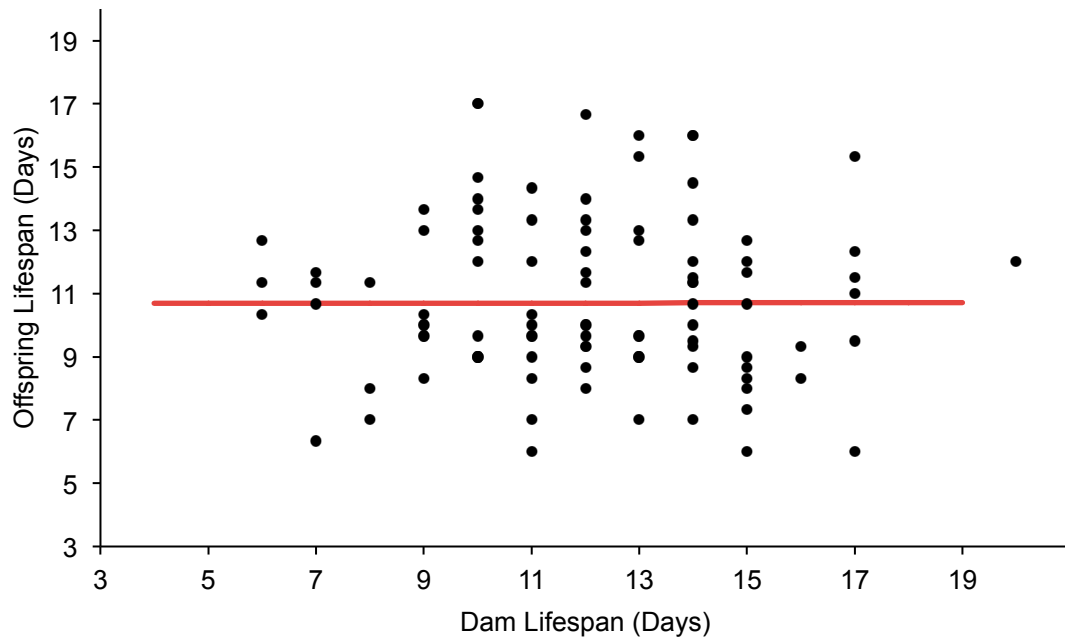

Supplement: S1 (10.1371/journal.pone.0058212.s001) [file journal.pone.0058212.s001]
