# Supplementary material for: Natural Variation for Lifespan and Stress Response in the Nematode Caenorhabditis remanei
Source: PLOS journal article supplement (doi:10.1371/journal.pone.0058212), 2013-04-26
Supplement: S2 (10.1371/journal.pone.0058212.s002) [file journal.pone.0058212.s002]

Table S1. Lifespan data (in days) for virgin *C. remanei* under typical laboratory conditions (20C, nematode growth media, lawn of *E. coli*). N represents number of individuals. Stderr is standard error.

|        |       |    |            |                    |        |        | Max. Observed  |
|--------|-------|----|------------|--------------------|--------|--------|----------------|
|        |       |    |            |                    |        |        | Death          |
| Sex    | Line  | N  | N Censored | Mean               | Stderr | Median | (not censored) |
| Female |       |    |            |                    |        |        |                |
|        | PB234 | 29 | 10         | 15.33              | 1.41   | 13     | 29             |
|        | PB237 | 28 | 6          | 9.69               | 0.78   | 10     | 18             |
|        | PB241 | 27 | 1          | 12.05              | 1.07   | 12     | 25             |
|        | PB244 | 26 | 3          | 10.65              | 1.29   | 8      | 27             |
|        | PB245 | 38 | 6          | 13.53              | 0.70   | 14     | 23             |
|        | PB261 | 33 | 6          | 12.66              | 0.65   | 12     | 20             |
|        | PB266 | 24 | 10         | 12.03              | 0.87   | 11     | 22             |
|        | PB269 | 22 | 7          | 10.98              | 0.90   | 10     | 20             |
|        | PB271 | 43 | 2          | 12.35              | 0.97   | 13     | 25             |
|        | PB272 | 32 | 2          | 9.90               | 0.73   | 11     | 20             |
| Male   |       |    |            |                    |        |        |                |
|        | PB237 | 24 | 6          | 15.53 <sup>a</sup> | 1.16   | 15     | 36             |
|        | PB241 | 26 | 10         | 17.05              | 1.39   | 16     | 37             |
|        | PB261 | 19 | 11         | 15.62              | 1.36   | 16     | 26             |
|        | PB266 | 17 | 9          | 16.79              | 1.50   | 17     | 31             |
|        | PB269 | 15 | 16         | 16.41 <sup>a</sup> | 1.49   | 15     | 25             |
|        | PB272 | 12 | 14         | 14.36 <sup>a</sup> | 1.39   | 13     | 21             |

<sup>a</sup>Mean survival time and its standard error were underestimated due to the largest observation being censored. Estimation was restricted to the largest observed death (non-censored).
